# Supplementary material
Source: publisher figshare collection journal article supplement (https://gsapubs.figshare.com/ndownloader/files/35908433)
Supplement: Supplementary file 1 [file 35908433]

## Sheet: All analyses
In-situ Sr isotopic compositions of clinopyroxene (Cpx) in spinel peridotite xenoliths from Jiaohe.
Sample	Analyses	Position	87Sr/86Sr	2SE	84Sr/86Sr	2SE	87Rb/86Sr
Lherzolite
17DSH03	Cpx-1	Rim	0.702789	0.000215878	0.0566688	0.000346413	4.59727e-05
		Core	0.702845	0.000199082	0.0578303	0.000308975	<DL
	Cpx-2	Rim	0.702231	0.000272265	0.058781	0.000287683	<DL
		Core	0.702649	0.000242518	0.0595492	0.000311107	<DL
17DSH05	Cpx-1	Rim	0.703887	0.000265548	0.057855	0.000683874	0.000354111
		Core	0.703784	0.000240568	0.0579924	0.000668418	<DL
17DSH08	Cpx-1	Rim	0.703768	0.000404652	0.0527457	0.000562337	<DL
		Core	0.70351	0.000397011	0.0591584	0.000362045	0.000101495
	Cpx-2	Rim	0.703441	0.000349603	0.0585446	0.000222135	0.000753938
		Core	0.703219	0.000319348	0.0591445	0.000221048	<DL
17DSH10	Cpx-1	Rim	0.70216	0.000287216	0.0583957	0.000220504	3.74601e-05
		Core	0.702198	0.000219607	0.0582621	0.000201328	<DL
	Cpx-2	Rim	0.70198	0.00025196	0.0586284	0.000210745	0.00168547
		Core	0.702426	0.000231219	0.058854	0.000188209	1.85622e-05
17DSH14	Cpx-1	Rim	0.7031	0.000310162	0.0519794	0.000462556	<DL
		Core	0.702779	0.000309939	0.0570237	0.00029621	<DL
17DSH16	Cpx-1	Rim	0.702145	0.000350528	0.0588952	0.000251762	<DL
		Core	0.70223	0.000307056	0.0587939	0.000254639	4.49354e-05
Harzburgite
17DSH17	Cpx-1	Rim	0.703632	0.000116003	0.0565579	9.46518e-05	0.00949189
		Core	0.703532	9.16427e-05	0.0571767	5.71751e-05	0.00322428
17DSH18	Cpx-1	Rim	0.703307	0.000120532	0.0570027	9.1709e-05	0.0415729
		Core	0.703596	9.15364e-05	0.0568447	6.32409e-05	0.0213579
17DSH19	Cpx-1	Rim	0.703647	0.000138552	0.05646	0.00010992	0.00707309
		Core	0.703374	0.000103855	0.0567774	8.23682e-05	0.00599211
17DSH20	Cpx-1	Rim	0.7037	0.000350883	0.0602376	0.000282531	0.000685601
		Core	0.703251	0.000544273	0.0615718	0.000414274	<DL
	Cpx-2	Rim	0.703049	0.000304727	0.0606618	0.00027768	0.0136691
		Core	0.703215	0.000365014	0.0619	0.000288946	<DL
2SE, 2 standard errors.
Analyses performed at China University of Geosciences, Wuhan.
Sample	Analyses	Position	87Sr/86Sr	2SE	84Sr/86Sr	2SE	87Rb/86Sr
Lherzolite
17DSH02	Cpx-01	Rim	0.702772	0.000131694	0.0564157	6.16572e-05	0.000273287
		Core	0.702675	9.67129e-05	0.0563465	5.49196e-05	0.000198307
		Core	0.702688	0.00011455	0.05631	6.97182e-05	0.00017235
	Cpx-02	Rim	0.702593	0.000126337	0.0563656	4.79082e-05	0.000377265
		Core	0.702574	8.82586e-05	0.0563089	3.5095e-05	0.000206714
		Core	0.702705	0.000123261	0.0561504	5.00005e-05	0.000259298
17DSH04	Cpx-01	Rim	0.702888	0.00012941	0.0561257	6.16467e-05	0.000127761
		Core	0.702935	9.35943e-05	0.0562297	6.09174e-05	0.000157594
		Core	0.702955	0.000127376	0.0562351	4.98522e-05	0.000175779
	Cpx-02	Rim	0.702813	0.000127753	0.0561315	6.55835e-05	0.000122509
		Core	0.702764	0.000118096	0.0562266	6.76789e-05	0.000166977
	Cpx-03	Rim	0.703078	0.00011229	0.0562326	5.98977e-05	0.000107801
		Core	0.702939	9.3236e-05	0.0562774	9.69842e-05	0.000173541
17DSH06	Cpx-01	Rim	0.703751	0.000168316	0.0563236	0.000109872	0.00081981
		Core	0.703757	0.000135532	0.0564021	8.97224e-05	0.00022652
	Cpx-02	Rim	0.703548	0.000135975	0.056264	8.70592e-05	0.00055136
		Core	0.703649	0.00014535	0.056348	0.000107174	0.000380828
		Core	0.703504	0.000169175	0.0563911	8.63895e-05	0.000440622
	Cpx-03	Rim	0.703719	0.000152017	0.0563127	9.31814e-05	0.000608884
		Core	0.7037	0.000176457	0.0562972	0.000115713	0.000318036
17DSH10	Cpx-01	Rim	0.702027	0.0001069	0.0563056	6.46666e-05	0.00026513
		Core	0.702044	0.000144594	0.0562897	5.15626e-05	0.000213428
	Cpx-02	Rim	0.701929	0.000100576	0.0563671	7.8845e-05	0.000445334
		Core	0.702137	0.000103737	0.0562276	6.57378e-05	0.000151024
	Cpx-03	Rim	0.701965	0.000156437	0.0562239	6.45038e-05	0.000269406
		Core	0.702128	0.000138284	0.0565173	6.51737e-05	0.000275273
Harzburgite
17DSH18	Cpx-01	Rim	0.703453	0.000176405	0.0562147	9.66058e-05	0.0255276
	Cpx-02	Rim	0.703701	5.88142e-05	0.0565381	2.29326e-05	0.0148809
		Core	0.703622	6.96375e-05	0.0564545	3.68329e-05	0.0276253
	Cpx-03	Rim	0.703583	9.66022e-05	0.0564134	6.13528e-05	0.018143
		Core	0.703624	6.23236e-05	0.0565058	3.96225e-05	0.016302
17DSH20	Cpx-01	Rim	0.703035	0.000156279	0.0560979	9.42736e-05	0.000325442
		Core	0.703118	0.000149637	0.0564234	7.75211e-05	0.00174186
	Cpx-02	Rim	0.703054	0.000131416	0.0564256	0.00010161	0.000805397
		Core	0.703119	0.000151675	0.0566192	9.50706e-05	0.000795604
	Cpx-03	Rim	0.703109	0.000181039	0.0563577	0.000105561	0.000184907
		Core	0.703172	0.000124629	0.0566367	0.000119536	0.000469223
2SE, 2 standard errors. DL, detection limit.
Analyses performed at Goethe-Universität Frankfurt.

## Sheet: Ref. Sr
Sr isotopic compositions of whole rock (WR) spinel peridotite xenoliths from Jiaohe.
Sample	Analysis	Reference	87Sr/86Sr
DSH00-2	WR	Zhou et al. (2007)	0.704587
DSH00-3	WR	Zhou et al. (2007)	0.702331
DSH00-4	WR	Zhou et al. (2007)	0.70383
DSH00-5	WR	Zhou et al. (2007)	0.702902
DSH00-6	WR	Zhou et al. (2007)	0.702444
DSH00-7	WR	Zhou et al. (2007)	0.702269
DSH00-8	WR	Zhou et al. (2007)	0.703276
DSH00-10	WR	Zhou et al. (2007)	0.703318
DSH00-11	WR	Zhou et al. (2007)	0.702875
DSH00-12	WR	Zhou et al. (2007)	0.702338
Sr isotopic compositions of clinopyroxene (Cpx) in spinel peridotite xenoliths from Jiaohe.
Sample	Analysis	Reference	87Sr/86Sr
YQS-1	Cpx	Yu et al. (2009)	0.705219
YQS-3	Cpx	Yu et al. (2009)	0.704967
YQS-4	Cpx	Yu et al. (2009)	0.707004
YQS-8	Cpx	Yu et al. (2009)	0.702979
YQS-9	Cpx	Yu et al. (2009)	0.702649
YQS-10	Cpx	Yu et al. (2009)	0.703143
YQS-11	Cpx	Yu et al. (2009)	0.70384
Sr isotopic compositions of host basalts from Jingpohu.
Sample	Analysis	Reference	87Sr/86Sr
JB-1	WR	Yan and Zhou (2008)	0.704296
JB-2	WR	Yan and Zhou (2008)	0.704583
JB-5	WR	Yan and Zhou (2008)	0.704041
JB-7	WR	Yan and Zhou (2008)	0.703947
JB-8	WR	Yan and Zhou (2008)	0.703932
JB-9	WR	Yan and Zhou (2008)	0.703915
JB-11	WR	Yan and Zhou (2008)	0.704417
JB-12	WR	Yan and Zhou (2008)	0.70443
JB-14	WR	Yan and Zhou (2008)	0.704402
JB-15	WR	Yan and Zhou (2008)	0.704426
JB-16A	WR	Yan and Zhou (2008)	0.704429
JB-16B	WR	Yan and Zhou (2008)	0.704415
JB-17	WR	Yan and Zhou (2008)	0.70442
JB-18	WR	Yan and Zhou (2008)	0.704427
JB-19	WR	Yan and Zhou (2008)	0.704556
JB-20	WR	Yan and Zhou (2008)	0.704414
JB-21	WR	Yan and Zhou (2008)	0.704457
JB-22	WR	Yan and Zhou (2008)	0.704456
JB-23	WR	Yan and Zhou (2008)	0.704423
JB-24	WR	Yan and Zhou (2008)	0.704429
JB-25	WR	Yan and Zhou (2008)	0.7041
JB-26	WR	Yan and Zhou (2008)	0.703983
JB-27	WR	Yan and Zhou (2008)	0.704018
Refences
Yan, J. and Zhao, J. X. (2008). Cenozoic alkali basalts from Jingpohu, NE China: the role of lithosphere–asthenosphere interaction. Journal of Asian Earth Sciences 33, 106-121.
Yu, S.Y., Xu, Y.G., Huang, X.L., Ma, J.L., Ge, W.C., Zhang, H.H. and Qin, X.F. (2009). Hf–Nd isotopic decoupling in continental mantle lithosphere beneath Northeast China: effects of pervasive mantle metasomatism. Journal of Asian Earth Sciences 35, 554-570.
Zhou, Q., Wu, F.Y., Chu, Z.Y., Yang, Y.H., Sun, D.Y. and Ge, W.C. (2007). Sr-Nd-Hf-Os isotopic characterizations of the Jiaohe peridotite xenoliths in Jilin province and constraints on the lithospheric mantle age in northeastern China. Acta Petrologica Sinica 23, 1269-1280. (In Chinese with English abstract)
